extravascular pressure were kept constant. Both vasodilatation and vasoconstriction may occur during the cooling period. Active renal vasoconstriction occurred during the rewarming period secondary to release of adrenergic agents. (*Hinshow, L. B., and others: Renal Vascular Response to Hypothermia, Proc. Soc. Exp. Biol. Med.* 118: 623 (Mar.) 1965.)

**HYPOTHERMIA** An 11 month old child was admitted to the hospital with coma, generalized convulsions, fever, and a diagnosis of meningitis. Therapy to stop convulsions was unsuccessful. Her body temperature was lowered inadvertently to 74° F. and then elevated and kept between 94° and 96° F. for a week. This therapy rapidly controlled the convulsions and the child was discharged cured. (*Robinson, A., and Buckler, J. M. H.: Emergency Hypothermia in Meningococcal Meningitis, Lancet* 1: 81 (Jan. 9) 1965.)

**HYPOTHERMIA** Bile was collected from rats anesthetized with pentobarbital, both intact and nephrectomized, at various time intervals after the intravenous injection of C<sup>14</sup>-atropine, and at body temperatures of 37°, 25° and 17° C. Urine was collected and analyzed at the termination of the 4 hour experiment. In the intact animal 50 per cent of the atropine appears in the bile and in the nephrectomized animals 70 per cent appears in the bile within 4 hours. Deep hypothermia appears to more markedly impair renal excretion of atropine and/or metabolites than it does hepatic excretion. At the lowest temperature studied, 17° C., the liver was capable of completely altering the material excreted in the bile. On the other hand, the kidney was unable to excrete C<sup>14</sup> into the urine at 17°. (*Kalser, S. C., and others: Drug Metabolism in Hypothermia. I. Biliary Excretion of C<sup>14</sup>-Atropine Metabolites in the Intact and Nephrectomized Rat, J. Pharmacol. Exp. Ther.* 147: 252 (Feb.) 1965.)

**HYPOTHERMIA** Of 277 patients with acute head trauma, 24 were treated by therapeutic hypothermia. Five patients soaked in ice water and 1 treated with cooled blanket were anesthetized with ether, while 1 soaked in ice water and 6 treated with cooled blanket were anesthetized with nitrous oxide. Of the

24 patients, 17 recovered and were uneventfully discharged, and 7 died. The cause of death was pneumonia in 1 patient and respiratory paralysis in 4; in 2 fatal cases therapeutic hypothermia was considered to have been protracted beyond the optimal time. The most suitable level of hypothermia was 25–30° C. and the optimal duration was less than 48 hours. (*Makino, K., and others: Therapeutic Hypothermia For Head Trauma (Japanese), Operation (Tokyo)* 18: 45, 1964.)

**CENTRAL VENOUS PRESSURE** Central venous pressure provides a sensitive and instantaneous picture of circulatory hemodynamics. It measures the resultant of three components which comprise the circulation, namely blood volume, cardiac pump, and the vascular bed and its resistance. Its use is advocated in every elderly patient undergoing extensive surgical procedures, and in patients who are oliguric or in those patients in whom there has been a forced diuresis. (*Borow, M., and others: Use of Central Venous Pressure as an Accurate Guide for Body Fluid Replacement, Surg. Gynec. Obstet.* 120: 545 (Mar.) 1965.)

**SHOCK** The two best monitors of fluid and blood volume replacement are the hourly urinary output and the central venous pressure. Blood volume determinations are useful, but they tend to be unreliable in shock. Before considering the use of either vasopressors or vasodilators, one should be certain that blood volume deficits have been corrected. In septic shock, the use of a steroid along with an adrenergic blocking agent seems indicated. Adrenergic blocking agents may be of value when used with adequate blood volume replacement, but considerable thought must be given to a technic that considers lowering an already low blood pressure in order to promote perfusion of tissue. (*Hamit, H. F.: Current Trends of Therapy and Research in Shock, Surg. Gynec. Obstet.* 120: 835 (Apr.) 1965.)

**PULMONARY RESISTANCE** In young calves, pulmonary vascular resistance was found to increase after total cardiopulmonary bypass, secondary to an increase in pulmonary arterial pressure without changes in cardiac
